# Supplementary material for: Deep Neural Frameworks Improve the Accuracy of General Practitioners in the Classification of Pigmented Skin Lesions
Source: MDPI journal article supplement (doi:10.3390/diagnostics10110969), 2020-11-18
Supplement: s1 [file s1]

**Supplementary Table S1. Classification metrics for each skin lesion subset of the HAM10000 images using eight different CNNs and low-resolution images without associated clinical features.**

| CNN              | Nev <sup>1</sup> | BK      | VL     | DTF     | ICA    | BCC    | Mel    |
|------------------|------------------|---------|--------|---------|--------|--------|--------|
| ResNet34         |                  |         |        |         |        |        |        |
| TPR <sup>2</sup> | 0.8597           | 0.4916  | 0.7307 | 0.2333  | 0.3783 | 0.5384 | 0.5136 |
| TNR              | 0.1402           | 0.5083  | 0.2692 | 0.7666  | 0.6216 | 0.4615 | 0.4863 |
| GM               | 0.6550           | 0.7578  | 0.7224 | 0.7087  | 0.7486 | 0.7569 | 0.7577 |
| ResNet50         |                  |         |        |         |        |        |        |
| TPR              | 0.8454           | 0.5214  | 0.7000 | 0.2916  | 0.3125 | 0.5151 | 0.5000 |
| TNR              | 0.1545           | 0.4785  | 0.3000 | 0.7083  | 0.6875 | 0.4848 | 0.5000 |
| GM               | 0.6656           | 0.7575  | 0.7318 | 0.7294  | 0.7352 | 0.7577 | 0.7578 |
| ResNet101        |                  |         |        |         |        |        |        |
| TPR              | 0.8640           | 0.4923  | 0.5121 | 0.2631  | 0.3720 | 0.5384 | 0.5979 |
| TNR              | 0.1359           | 0.5076  | 0.4878 | 0.7368  | 0.6279 | 0.4615 | 0.4020 |
| GM               | 0.6515           | 0.7578  | 0.7577 | 0.7203  | 0.7476 | 0.7569 | 0.7519 |
| SEResNet50       |                  |         |        |         |        |        |        |
| TPR              | 0.8934           | 0.54736 | 0.6923 | 0.34615 | 0.4242 | 0.6105 | 0.5302 |
| TNR              | 0.1065           | 0.45263 | 0.3076 | 0.65384 | 0.5757 | 0.3894 | 0.4697 |
| GM               | 0.6248           | 0.75649 | 0.7339 | 0.7429  | 0.7543 | 0.7503 | 0.7573 |
| VGG16            |                  |         |        |         |        |        |        |
| TPR              | 0.8838           | 0.5503  | 0.9411 | 0.1764  | 0.3586 | 0.6734 | 0.4780 |
| TNR              | 0.1161           | 0.4496  | 0.0588 | 0.8235  | 0.6413 | 0.3265 | 0.5219 |
| GM               | 0.6342           | 0.7563  | 0.5605 | 0.6799  | 0.7453 | 0.7386 | 0.7575 |
| VGG19            |                  |         |        |         |        |        |        |
| TPR              | 0.8782           | 0.4555  | 0.8695 | 0.2608  | 0.2631 | 0.6168 | 0.4455 |
| TNR              | 0.1217           | 0.5444  | 0.1304 | 0.7391  | 0.7368 | 0.3831 | 0.5544 |

|                |        |        |        |        |        |        |        |
|----------------|--------|--------|--------|--------|--------|--------|--------|
| GM             | 0.6394 | 0.7566 | 0.6470 | 0.7194 | 0.7203 | 0.7493 | 0.7560 |
| EfficientNetB5 |        |        |        |        |        |        |        |
| TPR            | 0.8591 | 0.4776 | 0.6111 | 0.2571 | 0.3380 | 0.4761 | 0.5555 |
| TNR            | 0.1408 | 0.5223 | 0.3888 | 0.7428 | 0.6619 | 0.5238 | 0.4444 |
| GM             | 0.6554 | 0.7575 | 0.7502 | 0.7181 | 0.7412 | 0.7575 | 0.7559 |
| MobileNet      |        |        |        |        |        |        |        |
| TPR            | 0.9053 | 0.6117 | 0.9047 | 0.3928 | 0.6122 | 0.7741 | 0.6172 |
| TNR            | 0.0946 | 0.3882 | 0.0952 | 0.6071 | 0.3877 | 0.2258 | 0.3827 |
| GM             | 0.6117 | 0.7501 | 0.6124 | 0.7507 | 0.7500 | 0.7055 | 0.7493 |

<sup>1</sup> Nev: melanocytic nevi; BK: bening keratosis; VL: vascular lesions; DTF: dermatofibroma;

ICA: intraepithelial carcinoma; BCC: basal cell carcinoma; Mel: melanoma.

<sup>2</sup> TPR: true positive rate; TNR: true negative rate; GM: geometric mean.

**Supplementary Table S2. Classification metrics for each skin lesion subset of the HAM10000 images using eight different CNNs and high-resolution images without associated clinical features.**

| CNN              | Nev <sup>1</sup> | BK     | VL     | DTF    | ICA    | BCC    | Mel    |
|------------------|------------------|--------|--------|--------|--------|--------|--------|
| ResNet34         |                  |        |        |        |        |        |        |
| TPR <sup>2</sup> | 0.8615           | 0.5163 | 0.7407 | 0.3437 | 0.4210 | 0.5578 | 0.5234 |
| TNR              | 0.1384           | 0.4836 | 0.2592 | 0.6562 | 0.5789 | 0.4421 | 0.4765 |
| GM               | 0.6535           | 0.7576 | 0.7189 | 0.7424 | 0.7540 | 0.7558 | 0.7575 |
| ResNet50         |                  |        |        |        |        |        |        |
| TPR              | 0.8761           | 0.5312 | 0.7826 | 0.5555 | 0.3333 | 0.5384 | 0.5555 |
| TNR              | 0.1238           | 0.4687 | 0.2173 | 0.4444 | 0.6666 | 0.4615 | 0.4444 |
| GM               | 0.6413           | 0.7572 | 0.7017 | 0.7559 | 0.7402 | 0.7569 | 0.7559 |
| ResNet101        |                  |        |        |        |        |        |        |
| TPR              | 0.8659           | 0.5075 | 0.5813 | 0.4285 | 0.4222 | 0.5546 | 0.6060 |

|                |        |        |        |        |        |        |        |
|----------------|--------|--------|--------|--------|--------|--------|--------|
| TNR            | 0.1340 | 0.4924 | 0.4186 | 0.5714 | 0.5777 | 0.4453 | 0.3939 |
| GM             | 0.6500 | 0.7578 | 0.7537 | 0.7547 | 0.7541 | 0.7560 | 0.7509 |
| SEResNet50     |        |        |        |        |        |        |        |
| TPR            | 0.8934 | 0.5625 | 0.7333 | 0.4444 | 0.4705 | 0.6391 | 0.5496 |
| TNR            | 0.1065 | 0.4375 | 0.2666 | 0.5555 | 0.5294 | 0.3608 | 0.4503 |
| GM             | 0.6248 | 0.7554 | 0.7215 | 0.7559 | 0.7573 | 0.7457 | 0.7563 |
| VGG16          |        |        |        |        |        |        |        |
| TPR            | 0.8839 | 0.5725 | 0.9444 | 0.4000 | 0.3894 | 0.6930 | 0.4972 |
| TNR            | 0.1160 | 0.4274 | 0.0555 | 0.6000 | 0.6105 | 0.3069 | 0.5027 |
| GM             | 0.6341 | 0.7546 | 0.5546 | 0.7516 | 0.7503 | 0.7337 | 0.7578 |
| VGG19          |        |        |        |        |        |        |        |
| TPR            | 0.8783 | 0.4725 | 0.8846 | 0.4000 | 0.4000 | 0.6422 | 0.4757 |
| TNR            | 0.1216 | 0.5274 | 0.1153 | 0.6000 | 0.6000 | 0.3577 | 0.5242 |
| GM             | 0.6393 | 0.7574 | 0.6335 | 0.7516 | 0.7516 | 0.7451 | 0.7575 |
| EfficientNetB5 |        |        |        |        |        |        |        |
| TPR            | 0.8601 | 0.5000 | 0.6315 | 0.2571 | 0.3835 | 0.5098 | 0.5869 |
| TNR            | 0.1398 | 0.5000 | 0.3684 | 0.7428 | 0.6164 | 0.4901 | 0.4130 |
| GM             | 0.6547 | 0.7578 | 0.7470 | 0.7181 | 0.7494 | 0.7578 | 0.7532 |
| MobileNet      |        |        |        |        |        |        |        |
| TPR            | 0.9053 | 0.6279 | 0.9200 | 0.5000 | 0.6666 | 0.8000 | 0.6341 |
| TNR            | 0.0946 | 0.3720 | 0.0800 | 0.5000 | 0.3333 | 0.2000 | 0.3658 |
| GM             | 0.6117 | 0.7476 | 0.5934 | 0.7578 | 0.7402 | 0.6931 | 0.7466 |

<sup>1</sup> Nev: melanocytic nevi; BK: bening keratosis; VL: vascular lesions; DTF: dermatofibroma;

ICA: intraepithelial carcinoma; BCC: basal cell carcinoma; Mel: melanoma.

<sup>2</sup> TPR: true positive rate; TNR: true negative rate; GM: geometric mean.

**Supplementary Table S3. Classification metrics for each skin lesion subset of the HAM10000 using eight different CNNs and low-resolution images with aggregated clinical data.**

| CNN              | Nev <sup>1</sup> | BK     | VL     | DTF    | ICA    | BCC    | Mel    |
|------------------|------------------|--------|--------|--------|--------|--------|--------|
| ResNet34         |                  |        |        |        |        |        |        |
| TPR <sup>2</sup> | 0.8687           | 0.4910 | 0.8260 | 0.2500 | 0.6200 | 0.6200 | 0.5333 |
| TNR              | 0.1312           | 0.5089 | 0.1739 | 0.7500 | 0.3750 | 0.3750 | 0.4666 |
| GM               | 0.6477           | 0.7578 | 0.6783 | 0.7154 | 0.7481 | 0.7481 | 0.7571 |
| ResNet50         |                  |        |        |        |        |        |        |
| TPR              | 0.8764           | 0.5875 | 0.7500 | 0.4444 | 0.4722 | 0.6206 | 0.5677 |
| TNR              | 0.1235           | 0.4124 | 0.2500 | 0.5555 | 0.5277 | 0.3793 | 0.4322 |
| GM               | 0.6410           | 0.7531 | 0.7154 | 0.7559 | 0.7573 | 0.7488 | 0.7550 |
| ResNet101        |                  |        |        |        |        |        |        |
| TPR              | 0.8713           | 0.5524 | 0.8500 | 0.1666 | 0.2903 | 0.6179 | 0.5229 |
| TNR              | 0.1286           | 0.4475 | 0.1500 | 0.8333 | 0.7096 | 0.3820 | 0.4770 |
| GM               | 0.6455           | 0.7561 | 0.6623 | 0.6738 | 0.7291 | 0.7492 | 0.7575 |
| SEResNet50       |                  |        |        |        |        |        |        |
| TPR              | 0.8887           | 0.5606 | 0.7272 | 0.8571 | 0.5588 | 0.7027 | 0.5449 |
| TNR              | 0.1112           | 0.4393 | 0.2727 | 0.1428 | 0.4411 | 0.2972 | 0.4550 |
| GM               | 0.6295           | 0.7556 | 0.7235 | 0.6570 | 0.7557 | 0.7311 | 0.7566 |
| VGG16            |                  |        |        |        |        |        |        |
| TPR              | 0.8799           | 0.5481 | 1.0000 | 0.1666 | 0.5700 | 0.6372 | 0.6170 |
| TNR              | 0.1200           | 0.4518 | 0.0000 | 0.8333 | 0.4250 | 0.3627 | 0.3829 |
| GM               | 0.6379           | 0.7564 | 0.0000 | 0.6738 | 0.7544 | 0.7460 | 0.7493 |
| VGG19            |                  |        |        |        |        |        |        |
| TPR              | 0.8687           | 0.5325 | 1.0000 | 0.3333 | 0.5000 | 0.7500 | 0.5822 |
| TNR              | 0.1312           | 0.4674 | 0.0000 | 0.6666 | 0.5000 | 0.2500 | 0.4177 |

|                |        |        |        |        |        |        |        |
|----------------|--------|--------|--------|--------|--------|--------|--------|
| GM             | 0.6477 | 0.7572 | 0.0000 | 0.7402 | 0.7578 | 0.7154 | 0.7537 |
| EfficientNetB5 |        |        |        |        |        |        |        |
| TPR            | 0.8631 | 0.4468 | 0.9047 | 0.5384 | 0.4186 | 0.5937 | 0.4965 |
| TNR            | 0.1368 | 0.5531 | 0.0952 | 0.4615 | 0.5813 | 0.4062 | 0.5034 |
| GM             | 0.6523 | 0.7561 | 0.6124 | 0.7569 | 0.7537 | 0.7524 | 0.7578 |
| MobileNet      |        |        |        |        |        |        |        |
| TPR            | 0.8887 | 0.5606 | 0.7272 | 0.8571 | 0.6315 | 0.7027 | 0.5449 |
| TNR            | 0.1112 | 0.4393 | 0.2727 | 0.1428 | 0.3684 | 0.2972 | 0.4550 |
| GM             | 0.6295 | 0.7556 | 0.7235 | 0.6570 | 0.7470 | 0.7311 | 0.7566 |

<sup>1</sup> Nev: melanocytic nevi; BK: bening keratosis; VL: vascular lesions; DTF: dermatofibroma;

ICA: intraepithelial carcinoma; BCC: basal cell carcinoma; Mel: melanoma.

<sup>2</sup> TPR: true positive rate; TNR: true negative rate; GM: geometric mean.

**Supplementary Table S4. Classification metrics for each skin lesion subset of the HAM10000 using eight different CNNs and high-resolution images with aggregated clinical data.**

| CNN              | Nev <sup>1</sup> | BK     | VL     | DTF    | ICA    | BCC    | Mel    |
|------------------|------------------|--------|--------|--------|--------|--------|--------|
| ResNet34         |                  |        |        |        |        |        |        |
| TPR <sup>2</sup> | 0.8705           | 0.5088 | 0.8333 | 0.6000 | 0.5263 | 0.6413 | 0.5416 |
| TNR              | 0.1294           | 0.4911 | 0.1666 | 0.4000 | 0.4736 | 0.3586 | 0.4583 |
| GM               | 0.6461           | 0.7578 | 0.6738 | 0.7516 | 0.7574 | 0.7453 | 0.7568 |
| ResNet50         |                  |        |        |        |        |        |        |
| TPR              | 0.9092           | 0.5977 | 0.8260 | 0.2000 | 0.4406 | 0.6582 | 0.5545 |
| TNR              | 0.0907           | 0.4022 | 0.1739 | 0.8000 | 0.5593 | 0.3417 | 0.4454 |
| GM               | 0.6071           | 0.7519 | 0.6783 | 0.6931 | 0.7557 | 0.7420 | 0.7560 |
| ResNet101        |                  |        |        |        |        |        |        |
| TPR              | 0.8732           | 0.5683 | 0.9545 | 0.6250 | 0.3636 | 0.6373 | 0.5284 |

|                |        |        |        |        |        |        |        |
|----------------|--------|--------|--------|--------|--------|--------|--------|
| TNR            | 0.1267 | 0.4316 | 0.0454 | 0.3750 | 0.6363 | 0.3626 | 0.4715 |
| GM             | 0.6439 | 0.7550 | 0.5339 | 0.7481 | 0.7462 | 0.7460 | 0.7573 |
| SEResNet50     |        |        |        |        |        |        |        |
| TPR            | 0.9128 | 0.6780 | 0.7307 | 0.2962 | 0.2950 | 0.5066 | 0.4583 |
| TNR            | 0.0871 | 0.3219 | 0.2692 | 0.7037 | 0.7049 | 0.4933 | 0.5416 |
| GM             | 0.6027 | 0.7375 | 0.7224 | 0.7308 | 0.7304 | 0.7578 | 0.7568 |
| VGG16          |        |        |        |        |        |        |        |
| TPR            | 0.8800 | 0.5654 | 1.0000 | 0.6666 | 0.6279 | 0.6571 | 0.6388 |
| TNR            | 0.1199 | 0.4345 | 0.0000 | 0.3333 | 0.3720 | 0.3428 | 0.3611 |
| GM             | 0.6378 | 0.7552 | 0.0000 | 0.7402 | 0.7476 | 0.7422 | 0.7457 |
| VGG19          |        |        |        |        |        |        |        |
| TPR            | 0.8746 | 0.4840 | 0.9230 | 0.5714 | 0.3750 | 0.6106 | 0.7903 |
| TNR            | 0.1253 | 0.5159 | 0.0769 | 0.4285 | 0.6250 | 0.3893 | 0.2096 |
| GM             | 0.6426 | 0.7577 | 0.5891 | 0.7547 | 0.7481 | 0.7502 | 0.6980 |
| EfficientNetB5 |        |        |        |        |        |        |        |
| TPR            | 0.8640 | 0.4631 | 0.9130 | 0.5384 | 0.4888 | 0.6372 | 0.5167 |
| TNR            | 0.1359 | 0.5368 | 0.0869 | 0.4615 | 0.5111 | 0.3627 | 0.4832 |
| GM             | 0.6516 | 0.7570 | 0.6025 | 0.7569 | 0.7577 | 0.7460 | 0.7576 |
| MobileNet      |        |        |        |        |        |        |        |
| TPR            | 0.9040 | 0.6234 | 0.9300 | 0.5321 | 0.8289 | 0.7890 | 0.6764 |
| TNR            | 0.0959 | 0.3765 | 0.0700 | 0.4678 | 0.1710 | 0.2109 | 0.3235 |
| GM             | 0.6132 | 0.7483 | 0.5790 | 0.7572 | 0.6765 | 0.6986 | 0.7379 |

<sup>1</sup> Nev: melanocytic nevi; BK: bening keratosis; VL: vascular lesions; DTF: dermatofibroma;

ICA: intraepithelial carcinoma; BCC: basal cell carcinoma; Mel: melanoma.

<sup>2</sup> TPR: true positive rate; TNR: true negative rate; GM: geometric mean.

**Supplementary Table S5. Classification metrics for each skin lesion in 163 images of the HAM10000 database by non-dermatologist, general practitioners without access to algorithmic outputs and no time constraint. EfficientNetB5 was used as comparator in the same image dataset.**

| CNN              | Nev <sup>1</sup> | BK     | VL     | DTF    | ICA    | BCC    | Mel    |
|------------------|------------------|--------|--------|--------|--------|--------|--------|
| GPs <sup>2</sup> |                  |        |        |        |        |        |        |
| TPR <sup>3</sup> | 0.7950           | 0.2680 | 0.0200 | 0.0130 | 0.0720 | 0.1780 | 0.2640 |
| TNR              | 0.2050           | 0.7320 | 0.9800 | 0.9870 | 0.9280 | 0.8220 | 0.7360 |
| GM               | 0.6960           | 0.7220 | 0.4580 | 0.4170 | 0.5830 | 0.6810 | 0.7210 |
| EfficientNetB5   |                  |        |        |        |        |        |        |
| TPR              | 0.8620           | 0.6000 | 0.8620 | 0.6670 | 0.5710 | 0.6000 | 0.5560 |
| TNR              | 0.1380           | 0.4000 | 0.1380 | 1.0000 | 0.4290 | 0.4000 | 0.4440 |
| GM               | 0.6530           | 0.7520 | 0.6530 | 0.9220 | 0.7550 | 0.7520 | 0.7560 |

<sup>1</sup> Nev: melanocytic nevi; BK: benign keratosis; VL: vascular lesions; DTF: dermatofibroma; ICA: intraepithelial carcinoma; BCC: basal cell carcinoma; Mel: melanoma.

<sup>2</sup> GPs: general practitioners

<sup>3</sup> TPR: true positive rate; TNR: true negative rate; GM: geometric mean.

**Supplementary Table S6. Classification metrics for each skin lesion in 70 images of the HAM10000 database by non-dermatologist, general practitioners without (n=35) or with access (n=35) to algorithmic outputs and time constraint of 45 sec/image.**

| CNN                    | Nev <sup>1</sup> | BK    | VL    | DTF   | ICA   | BCC   | Mel   |
|------------------------|------------------|-------|-------|-------|-------|-------|-------|
| GPs (W/O) <sup>2</sup> |                  |       |       |       |       |       |       |
| TPR <sup>3</sup>       | 0.607            | 0.142 | 0.000 | 0.000 | 0.033 | 0.100 | 0.083 |
| TNR                    | 0.393            | 0.858 | 1.000 | 1.000 | 0.967 | 0.900 | 0.917 |
| GM                     | 0.751            | 0.656 | 0.000 | 0.000 | 0.503 | 0.618 | 0.598 |

GPs(W)

|     |       |       |       |       |       |       |       |
|-----|-------|-------|-------|-------|-------|-------|-------|
| TPR | 0.686 | 0.053 | 0.000 | 0.000 | 0.000 | 0.547 | 0.356 |
| TNR | 0.314 | 0.947 | 1.000 | 1.000 | 1.000 | 0.453 | 0.644 |
| GM  | 0.736 | 0.549 | 0.000 | 0.000 | 0.000 | 0.757 | 0.745 |

---

<sup>1</sup> Nev: melanocytic nevi; BK: bening keratosis; VL: vascular lesions; DTF: dermatofibroma;

ICA: intraepithelial carcinoma; BCC: basal cell carcinoma; Mel: melanoma.

<sup>2</sup> GPs (W/O): general practitioners (without); GPs (W): general practitioners (with)

<sup>3</sup> TPR: true positive rate; TNR: true negative rate; GM: geometric mean.
